# Supplementary material for: Candida tenuis xylose reductase catalysed reduction of acetophenones: the effect of ring-substituents on catalytic efficiency
Source: Royal Society of Chemistry journal article supplement (doi:10.1039/c1ob05510k), 2011-01-01

## SUPPLEMENTARY DATA

### ***Candida tenuis* Xylose Reductase Catalysed Reduction of Acetophenones: The Effect of Ring-Substituents on Catalytic Efficiency**

Michael Vogl<sup>a</sup>, Regina Kratzer<sup>b</sup>, Bernd Nidetzky<sup>b</sup> and Lothar Brecker<sup>\*a</sup>

*a* University of Vienna, Department of Organic Chemistry, Währinger Straße 38, A-1090 Wien, Austria. E-Mail: lothar.brecker@univie.ac.at

*b* Graz University of Technology, Institute of Biotechnology and Biochemical Engineering, Petersgasse 12, A-8010 Graz, Austria

**Content:**

**Table S1:**

|                                                                                                                                                                                    |     |
|------------------------------------------------------------------------------------------------------------------------------------------------------------------------------------|-----|
| Values and parameters used for calculation of Figure 1.                                                                                                                            | S3  |
| <b><sup>1</sup>H NMR Spectra:</b>                                                                                                                                                  |     |
| <i>ortho</i> -bromo acetophenone [4]                                                                                                                                               | S4  |
| <i>meta</i> -bromo acetophenone [5]                                                                                                                                                | S5  |
| <i>para</i> -bromo acetophenone [6]                                                                                                                                                | S6  |
| <i>ortho</i> -iodo acetophenone [7]                                                                                                                                                | S7  |
| <i>meta</i> -iodo acetophenone [8]                                                                                                                                                 | S8  |
| <i>ortho</i> -cyano acetophenone [10]                                                                                                                                              | S9  |
| <i>meta</i> -cyano acetophenone [11]                                                                                                                                               | S10 |
| <i>ortho</i> -nitro acetophenone [13]                                                                                                                                              | S11 |
| <i>meta</i> -nitro acetophenone [14]                                                                                                                                               | S12 |
| <i>para</i> -nitro acetophenone [15]                                                                                                                                               | S13 |
| <i>ortho</i> -methoxy acetophenone [22]                                                                                                                                            | S14 |
| <i>para</i> -methoxy acetophenone [23]                                                                                                                                             | S15 |
| <i>ortho</i> -acetoxy acetophenone [24]                                                                                                                                            | S16 |
| <i>para</i> -acetoxy acetophenone [25]                                                                                                                                             | S17 |
| <i>meta</i> -acetamino acetophenone [26]                                                                                                                                           | S18 |
| 1-( <i>ortho</i> -chloro-phenyl) ethanol [28]                                                                                                                                      | S19 |
| 1-( <i>ortho</i> -bromo-phenyl) ethanol [29]                                                                                                                                       | S20 |
| ( <i>S</i> )-1-( <i>ortho</i> -Chlorophenyl) ethyl-( <i>S</i> )- $\alpha$ -methoxy- $\alpha$ -trifluoromethylphenylacetate [30] &<br>1-( <i>ortho</i> -chloro-phenyl) ethanol [28] | S21 |
| ( <i>S</i> )-1-( <i>ortho</i> -Chlorophenyl) ethyl-( <i>R</i> )- $\alpha$ -methoxy- $\alpha$ -trifluoromethylphenylacetate [31]                                                    | S22 |
| ( <i>S</i> )-1-( <i>ortho</i> -bromophenyl) ethyl-( <i>S</i> )- $\alpha$ -methoxy- $\alpha$ -trifluoromethylphenylacetate [32]                                                     | S23 |
| ( <i>S</i> )-1-( <i>ortho</i> -bromophenyl) ethyl-( <i>R</i> )- $\alpha$ -methoxy- $\alpha$ -trifluoromethylphenylacetate [33]                                                     | S24 |

**Table S1:** Values and parameters used for calculation of Figure 1.

| Substanz                                | $\sigma_H$ | $\log P$ | <i>p&amp;m&amp;o</i> | $\text{cat}_{\text{eff}}$ | $\log P\text{-acph}$ | $\log \text{cat}_{\text{eff}}$ | $\log \text{cat}_{\text{eff}}\text{-acph}$ |
|-----------------------------------------|------------|----------|----------------------|---------------------------|----------------------|--------------------------------|--------------------------------------------|
| acetophenone [27]                       |            | 1.665    | 0                    | 0.5                       | 0                    | -0.301                         | 0.000                                      |
| <i>ortho</i> -chloro acetophenone [1]   | 0.68       | 2.09     | 2                    | 340                       | 0.425                | 2.531                          | 2.833                                      |
| <i>ortho</i> -bromo acetophenone [4]    | 0.70       | 2.277    | 2                    | 261                       | 0.612                | 2.417                          | 2.718                                      |
| <i>ortho</i> -iodo acetophenone [7]     | 0.63       | 2.275    | 2                    | 61                        | 0.610                | 1.785                          | 2.086                                      |
| <i>ortho</i> -fluoro acetophenone [9]   | 0.54       | 1.295    | 2                    | 17                        | -0.370               | 1.230                          | 1.531                                      |
| <i>ortho</i> -cyano acetophenone [10]   | 1.32       | 0.872    | 2                    | 135                       | -0.793               | 2.130                          | 2.431                                      |
| <i>ortho</i> -hydroxy acetophenone [16] | 0.04       | 1.964    | 2                    | 4.5                       | 0.299                | 0.653                          | 0.954                                      |
| <i>ortho</i> -methoxy acetophenone [22] | 0.00       | 1.88     | 2                    | 14                        | 0.215                | 1.146                          | 1.447                                      |
| <i>ortho</i> -acetoxy acetophenone [24] | -0.38      | 0.817    | 2                    | 1.8                       | -0.848               | 0.255                          | 0.556                                      |
| <i>para</i> -chloro acetophenone [3]    | 0.23       | 2.35     | 1                    | 6.6                       | 0.685                | 0.820                          | 1.121                                      |
| <i>para</i> -bromo acetophenone [6]     | 0.23       | 2.43     | 1                    | 3.2                       | 0.765                | 0.505                          | 0.806                                      |
| <i>para</i> -cyano acetophenone [12]    | 0.66       | 1.22     | 1                    | 1.8                       | -0.445               | 0.255                          | 0.556                                      |
| <i>meta</i> -chloro acetophenone [2]    | 0.37       | 2.51     | 0                    | 0.8                       | 0.845                | -0.097                         | 0.204                                      |
| <i>meta</i> -bromo acetophenone [5]     | 0.39       | 2.577    | 0                    | 1.3                       | 0.912                | 0.114                          | 0.415                                      |
| <i>meta</i> -iodo acetophenone [8]      | 0.35       | 2.898    | 0                    | 0.3                       | 1.233                | -0.523                         | -0.222                                     |
| <i>meta</i> -cyano acetophenone [11]    | 0.56       | 1.16     | 0                    | 1.4                       | -0.505               | 0.146                          | 0.447                                      |
| <i>meta</i> -hydroxy acetophenon [17]   | 0.12       | 1.39     | 0                    | 2.4                       | -0.275               | 0.380                          | 0.681                                      |
| <i>meta</i> -amino acetophenone [20]    | -0.21      | 0.691    | 0                    | 2.2                       | -0.974               | 0.342                          | 0.643                                      |
| <i>ortho</i> -nitro acetophenone [13]   | 1.40       | 1.28     | 2                    | 18                        | -0.385               | 1.255                          | 1.556                                      |
| <i>meta</i> -nitro acetophenone [14]    | 0.71       | 1.49     | 0                    | 37                        | -0.175               | 1.568                          | 1.869                                      |
| <i>para</i> -nitro acetophenone [15]    | 0.78       | 1.42     | 1                    | 224                       | -0.245               | 2.350                          | 2.651                                      |

*ortho*-bromo acetophenone [4]

$^1\text{H-NMR}$  ( $\text{D}_2\text{O}/\text{CD}_3\text{OD}$  9:1)

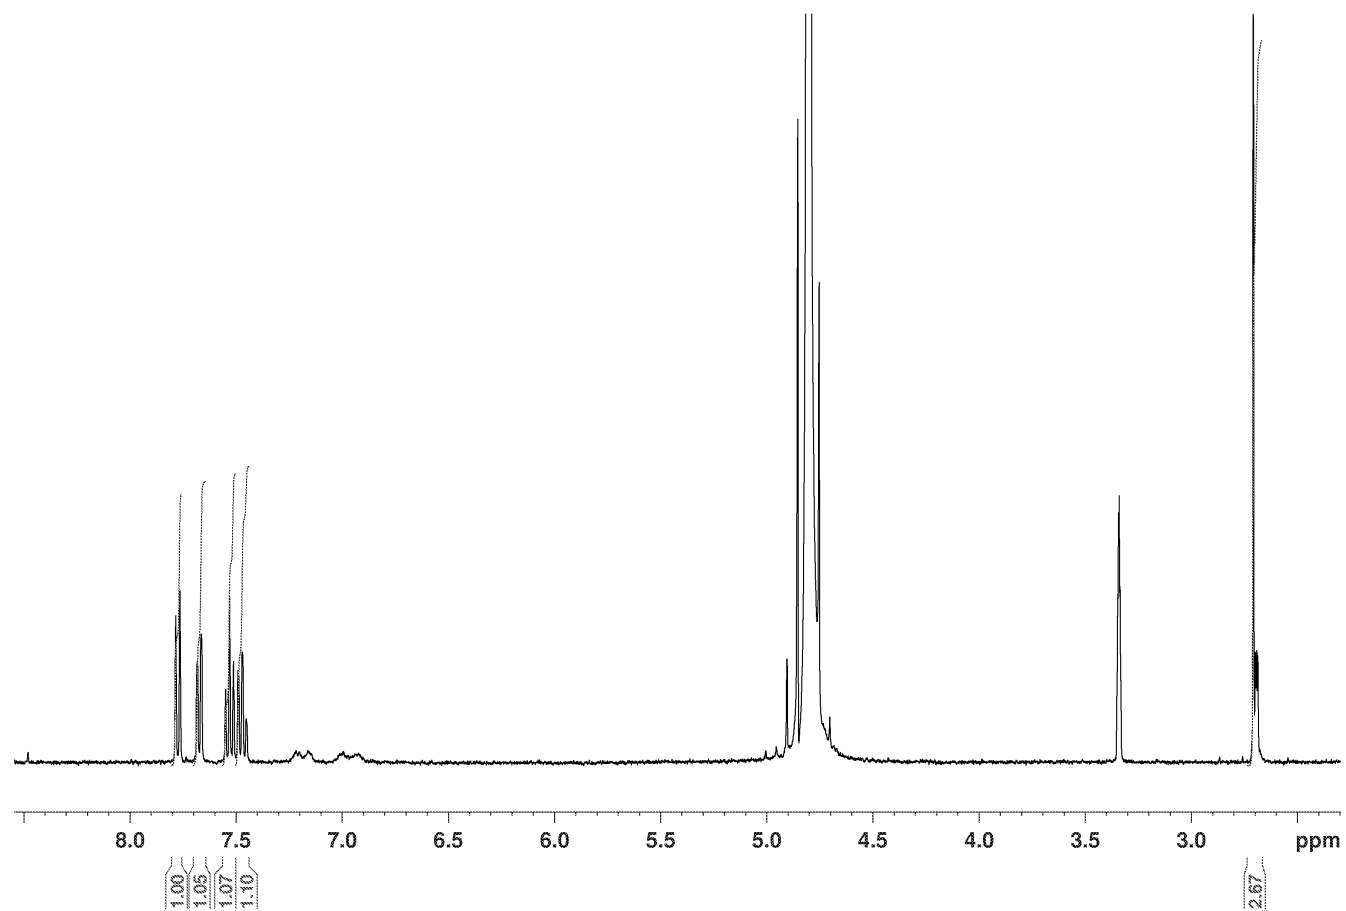

*meta*-bromo acetophenone [5]

$^1\text{H-NMR}$  ( $\text{D}_2\text{O}/\text{CD}_3\text{OD}$  9:1)

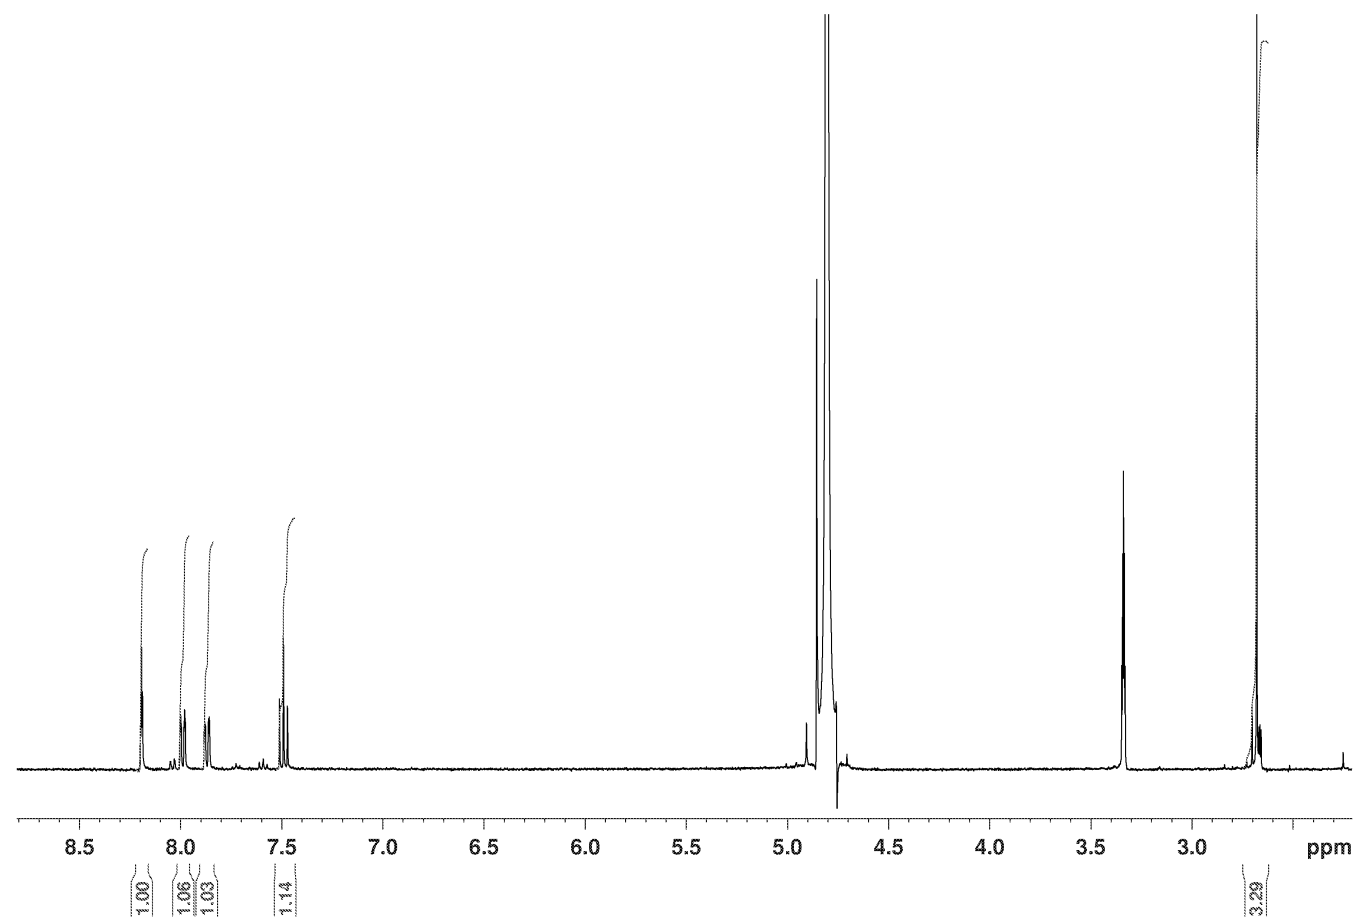

*para*-bromo acetophenone [6]

$^1\text{H-NMR}$  ( $\text{D}_2\text{O}/\text{CD}_3\text{OD}$  9:1)

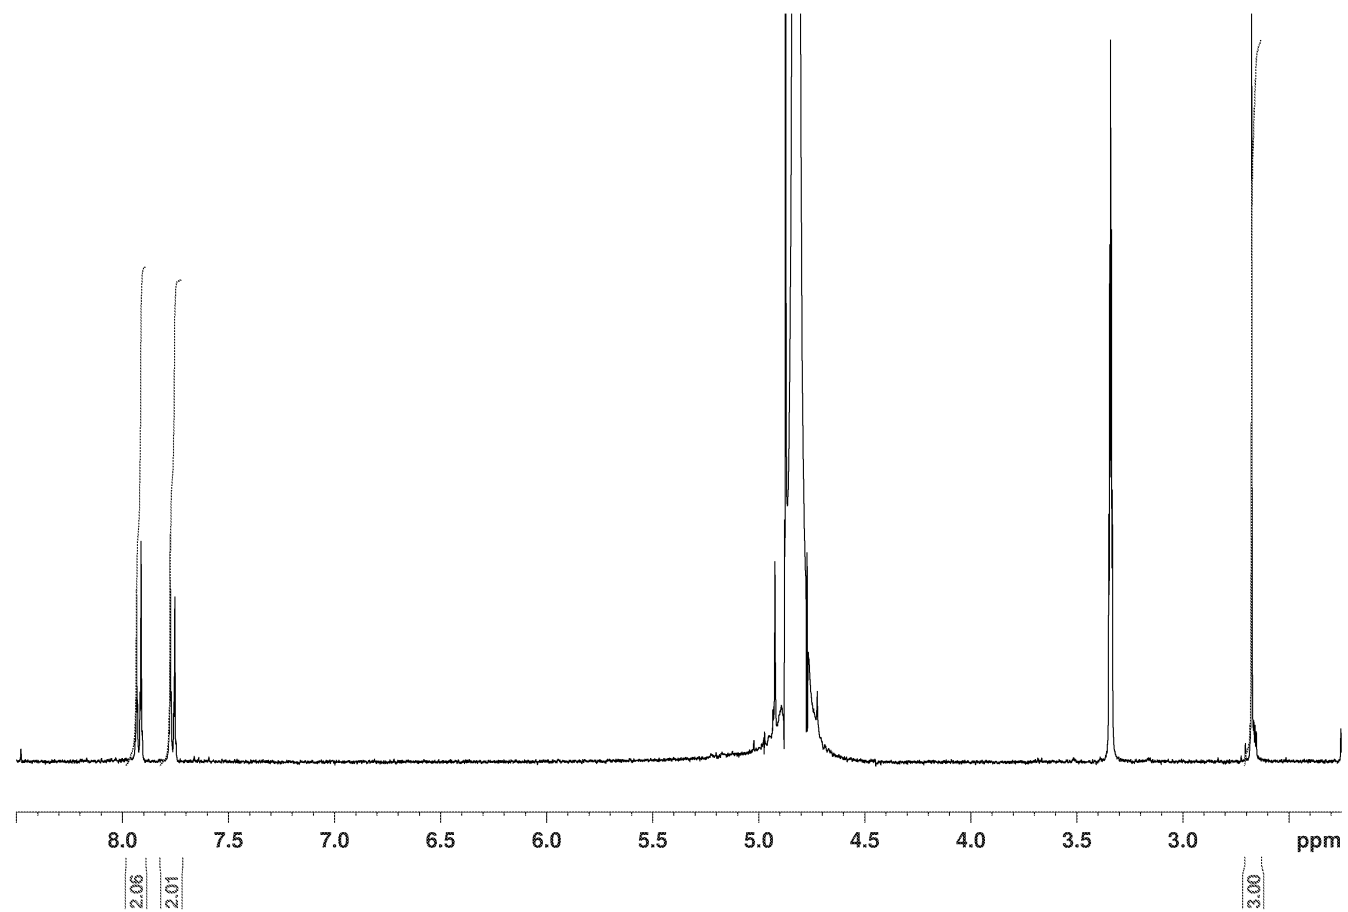

*ortho*-iodo acetophenone [7]

$^1\text{H-NMR}$  ( $\text{D}_2\text{O}/\text{CD}_3\text{OD}$  9:1)

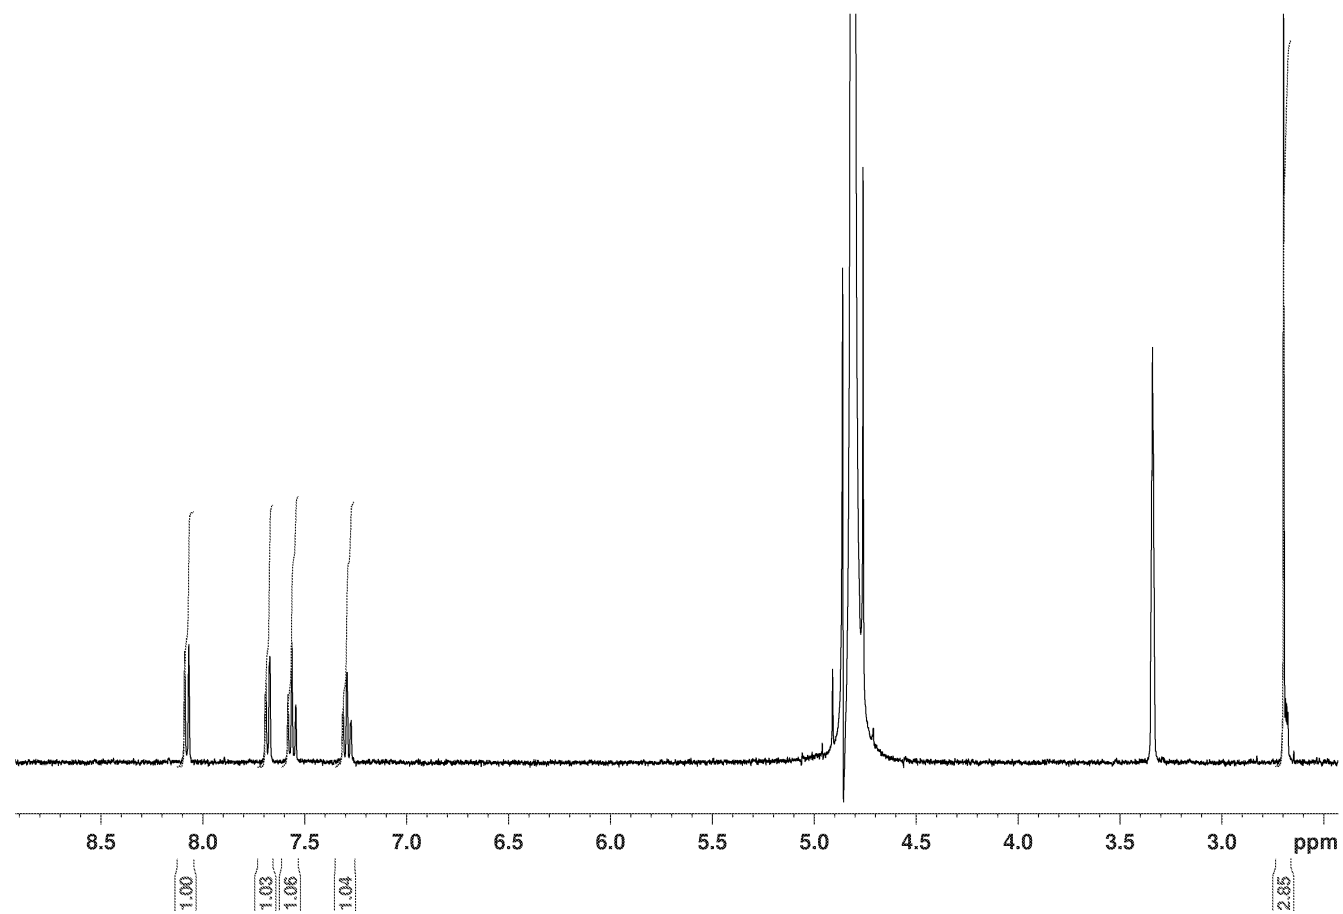

*meta*-iodo acetophenone [**8**]

$^1\text{H-NMR}$  ( $\text{D}_2\text{O}/\text{CD}_3\text{OD}$  9:1)

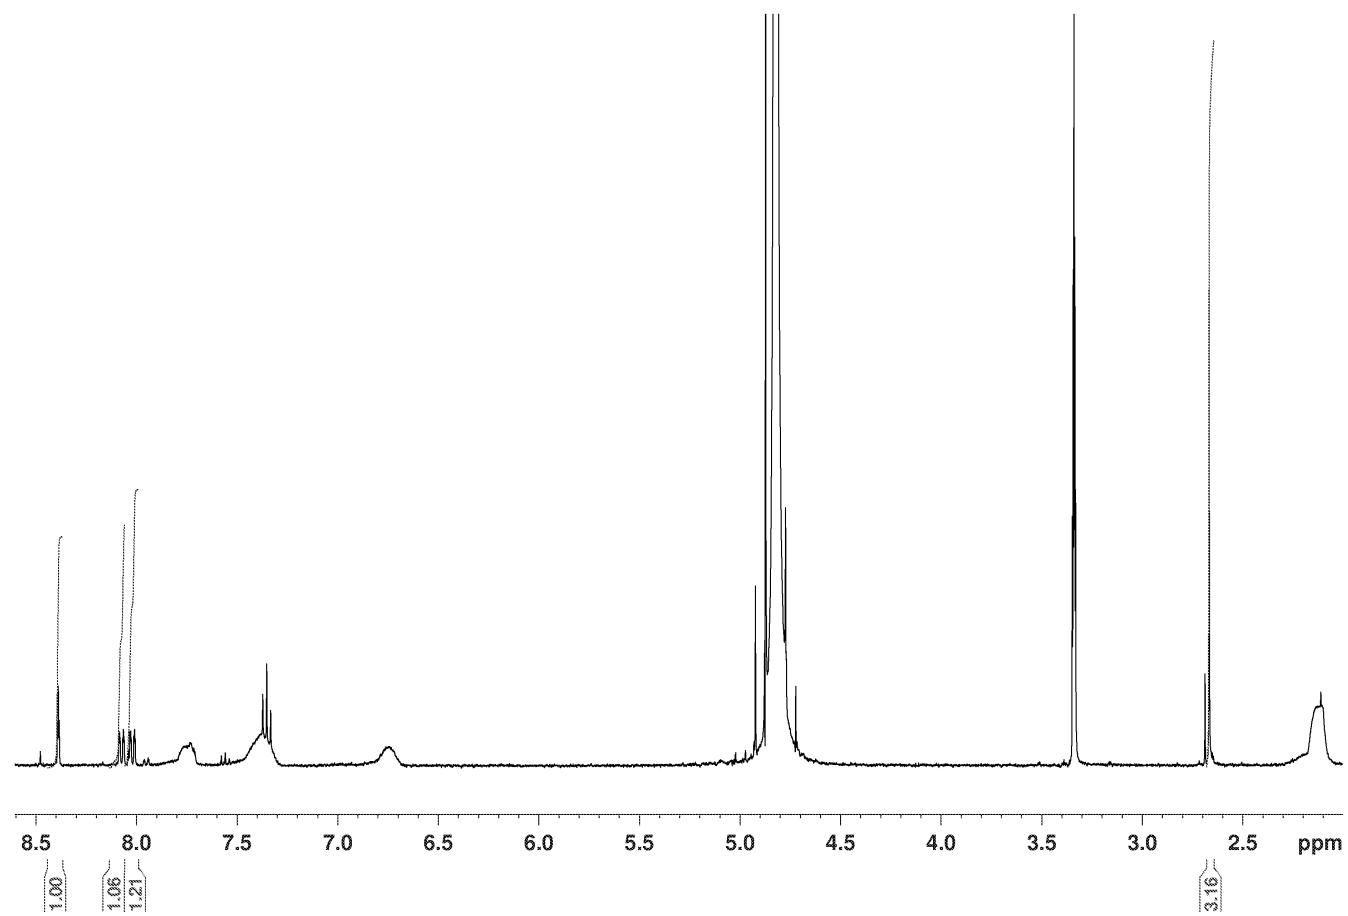



*ortho*-cyano acetophenone [**10**]

$^1\text{H-NMR}$  ( $\text{D}_2\text{O}/\text{CD}_3\text{OD}$  9:1)

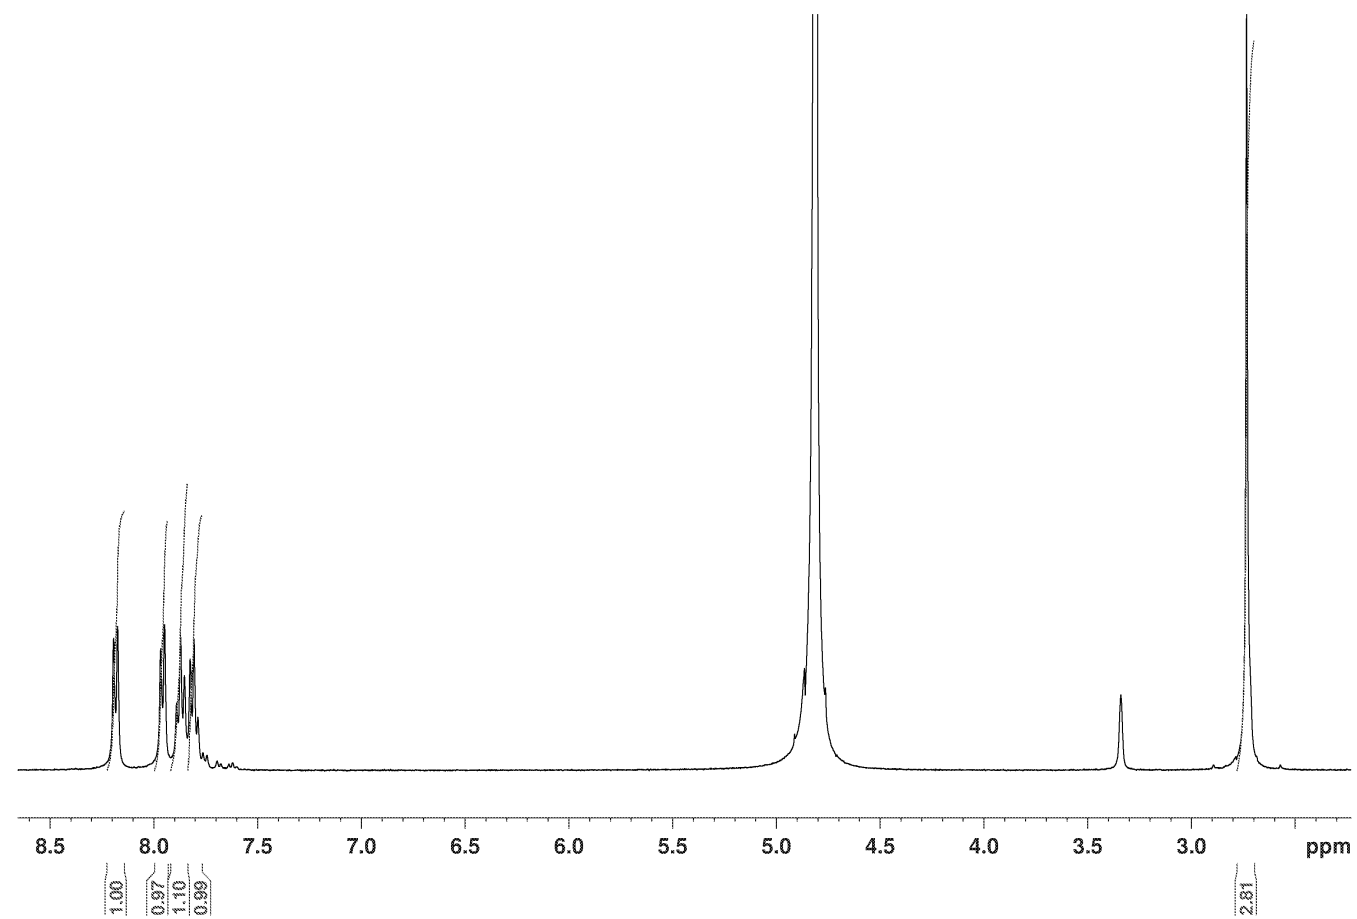

*meta*-cyano acetophenone [**11**]

<sup>1</sup>H-NMR (D<sub>2</sub>O/CD<sub>3</sub>OD 9:1)

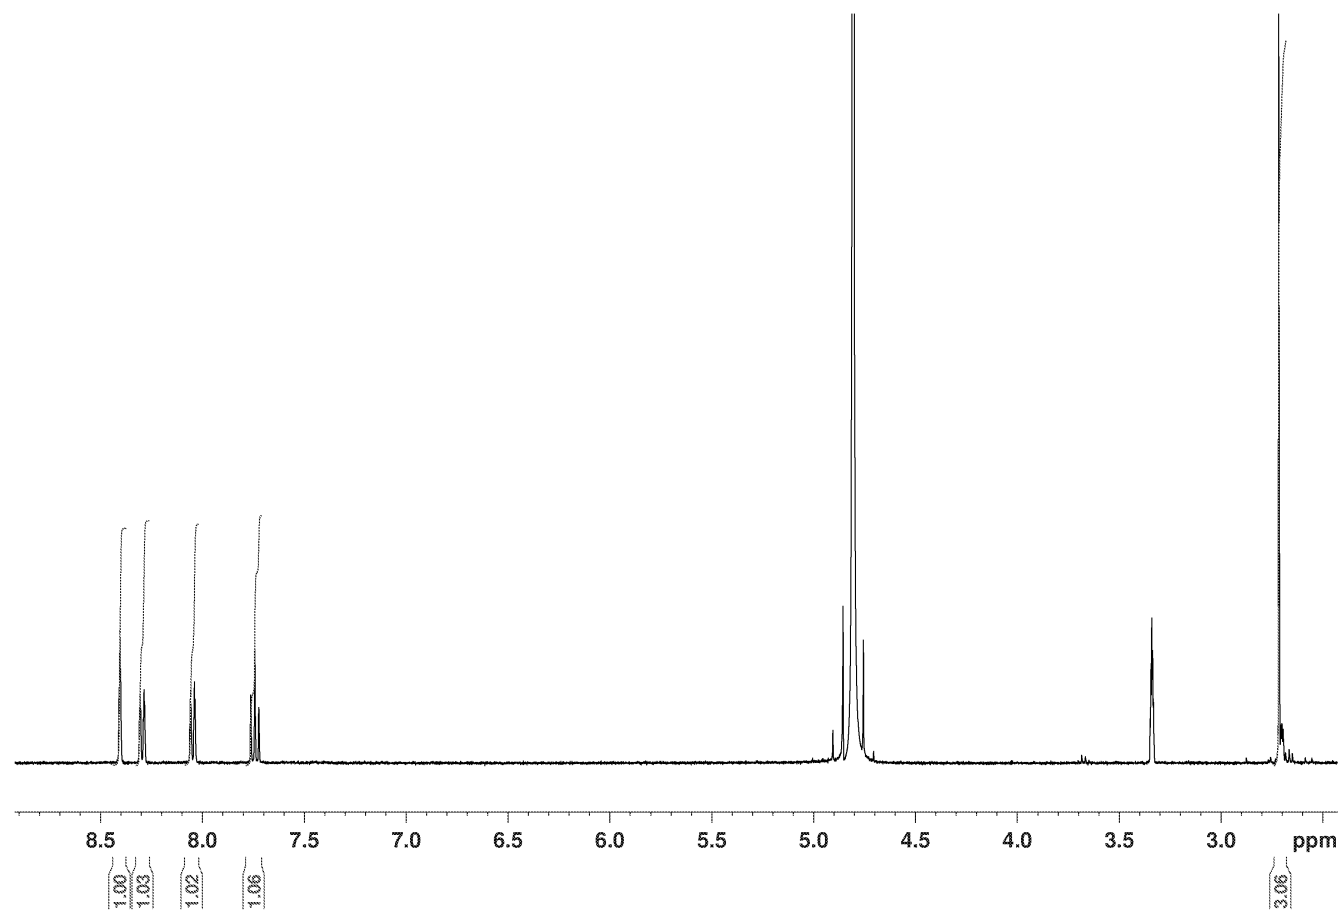

*ortho*-nitro acetophenone [13]

<sup>1</sup>H-NMR (D<sub>2</sub>O/CD<sub>3</sub>OD 9:1)

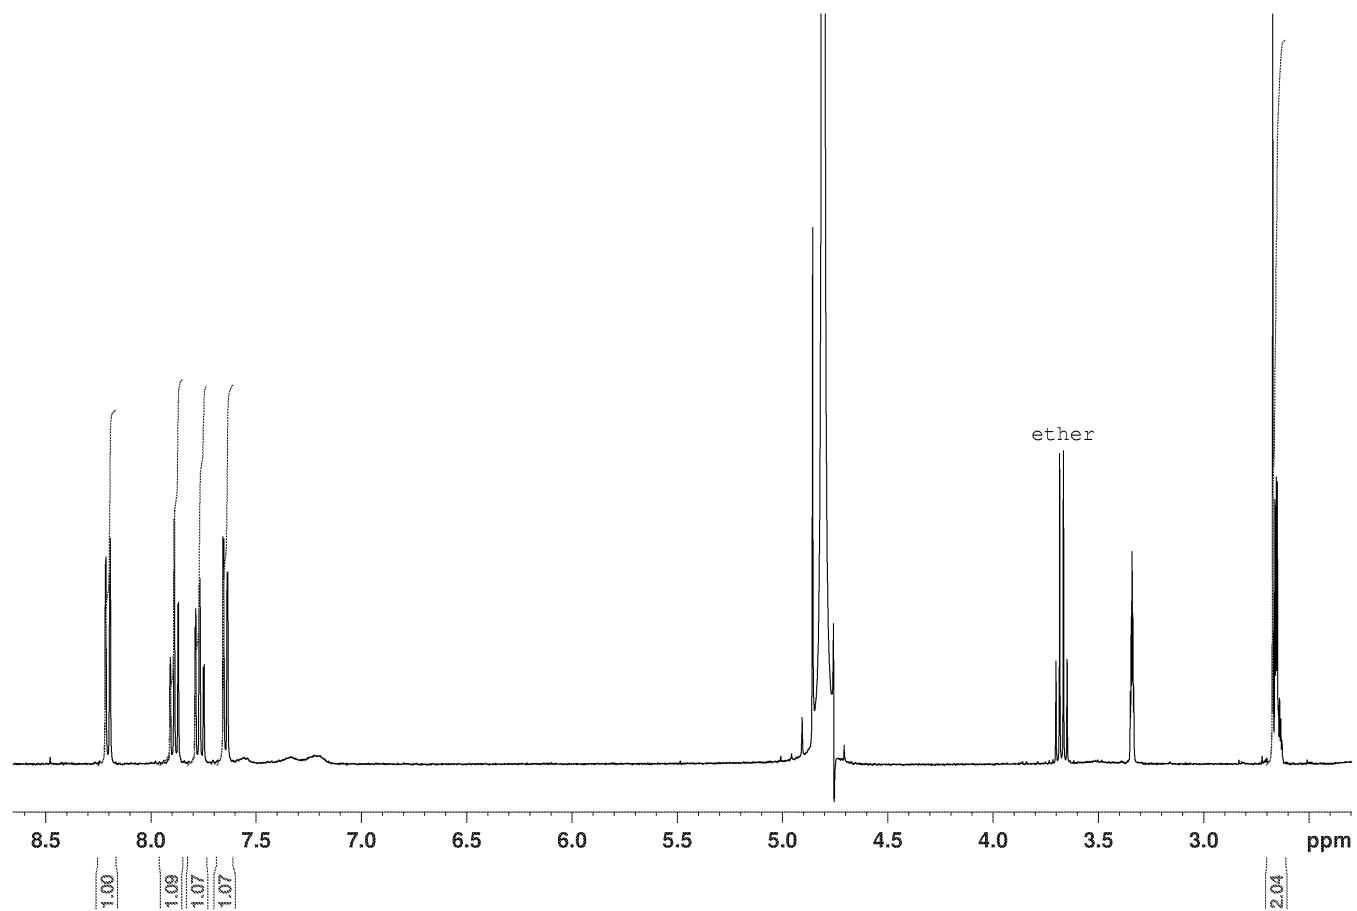

*meta*-nitro acetophenone [**14**]

$^1\text{H-NMR}$  ( $\text{D}_2\text{O}/\text{CD}_3\text{OD}$  9:1)

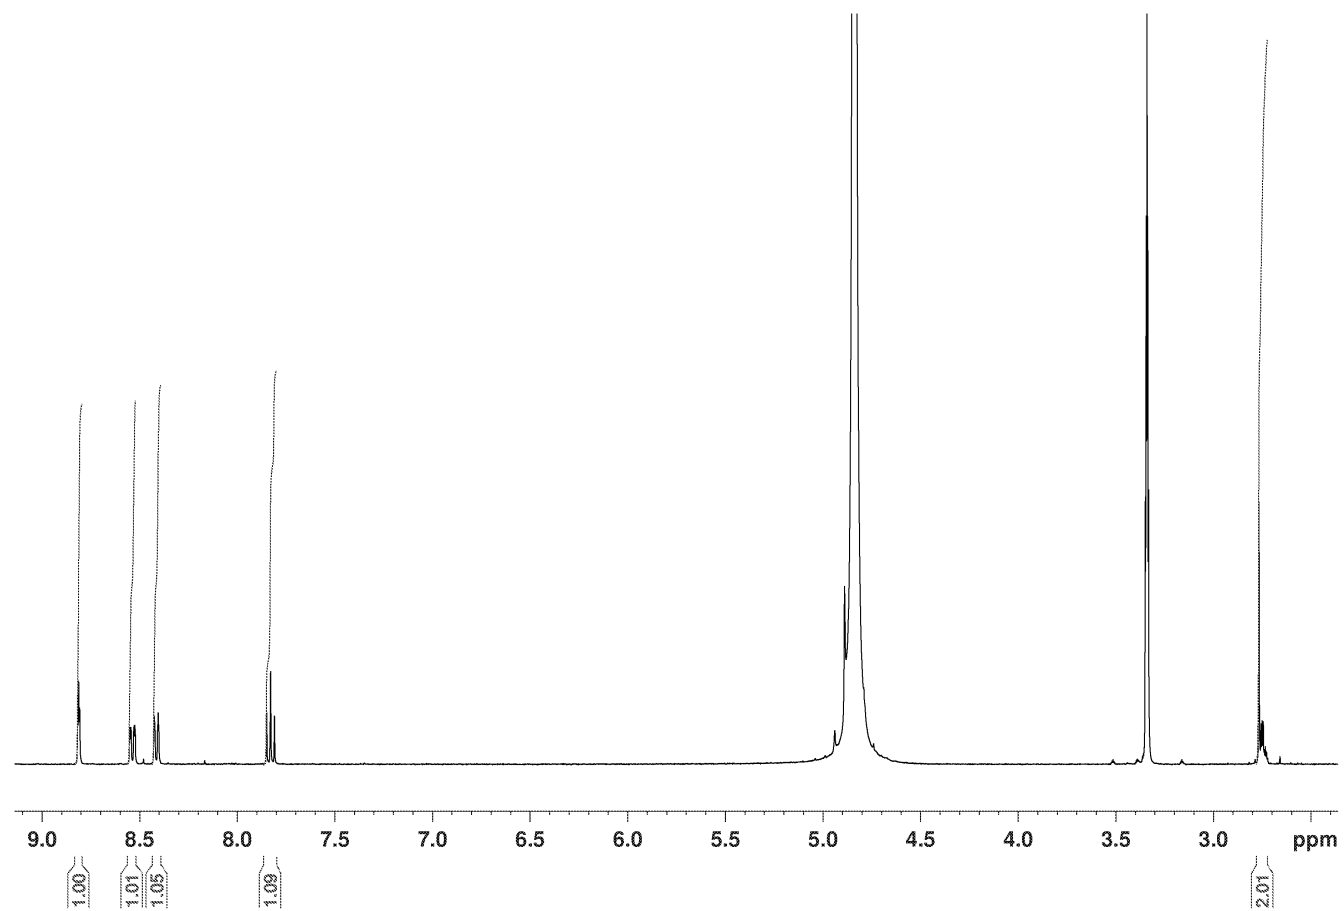

*para*-nitro acetophenone [15]

<sup>1</sup>H-NMR (D<sub>2</sub>O/CD<sub>3</sub>OD 9:1)

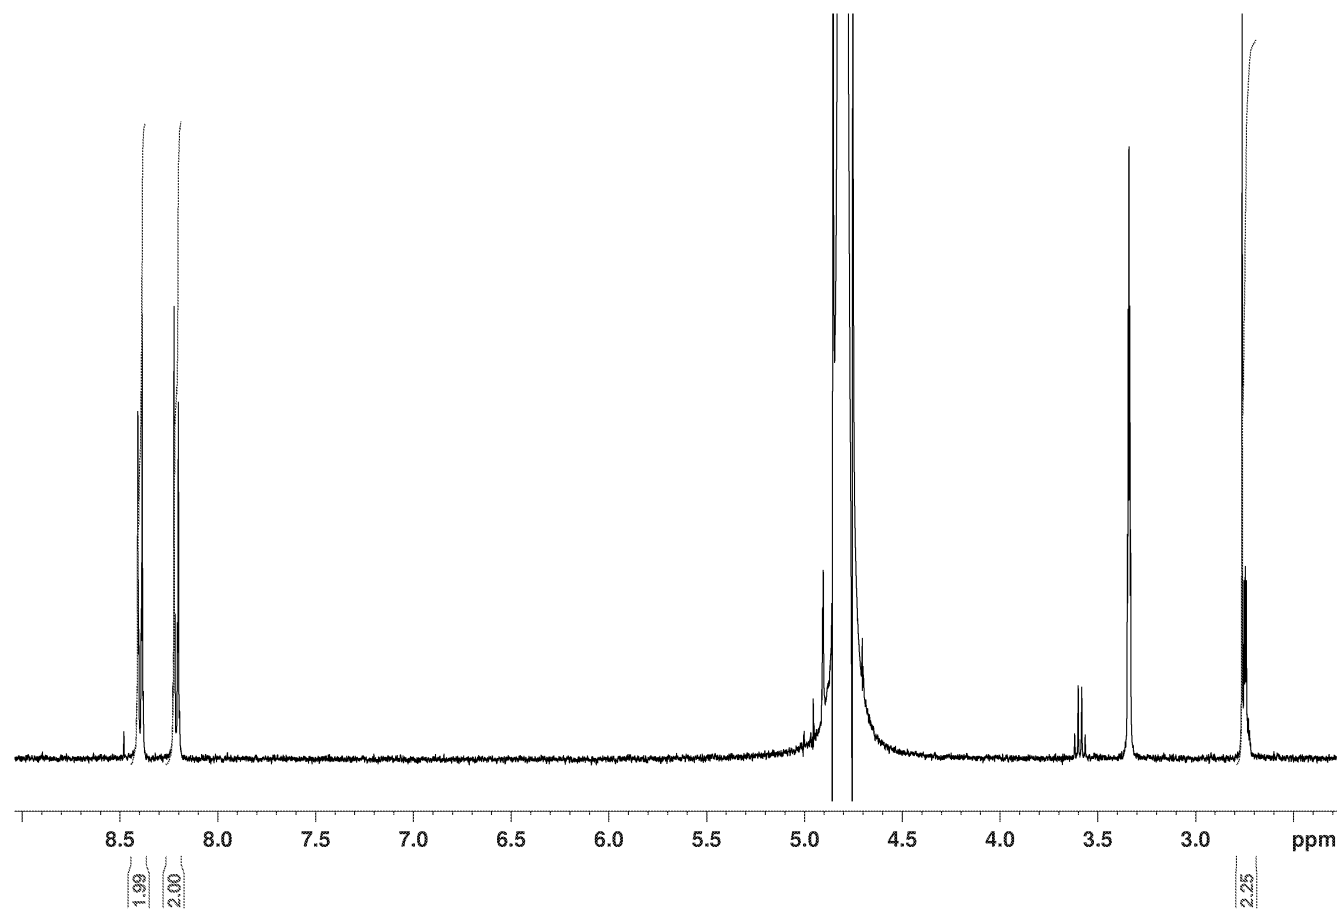

*ortho*-methoxy acetophenone [22]

$^1\text{H-NMR}$  ( $\text{D}_2\text{O}/\text{CD}_3\text{OD}$  9:1)

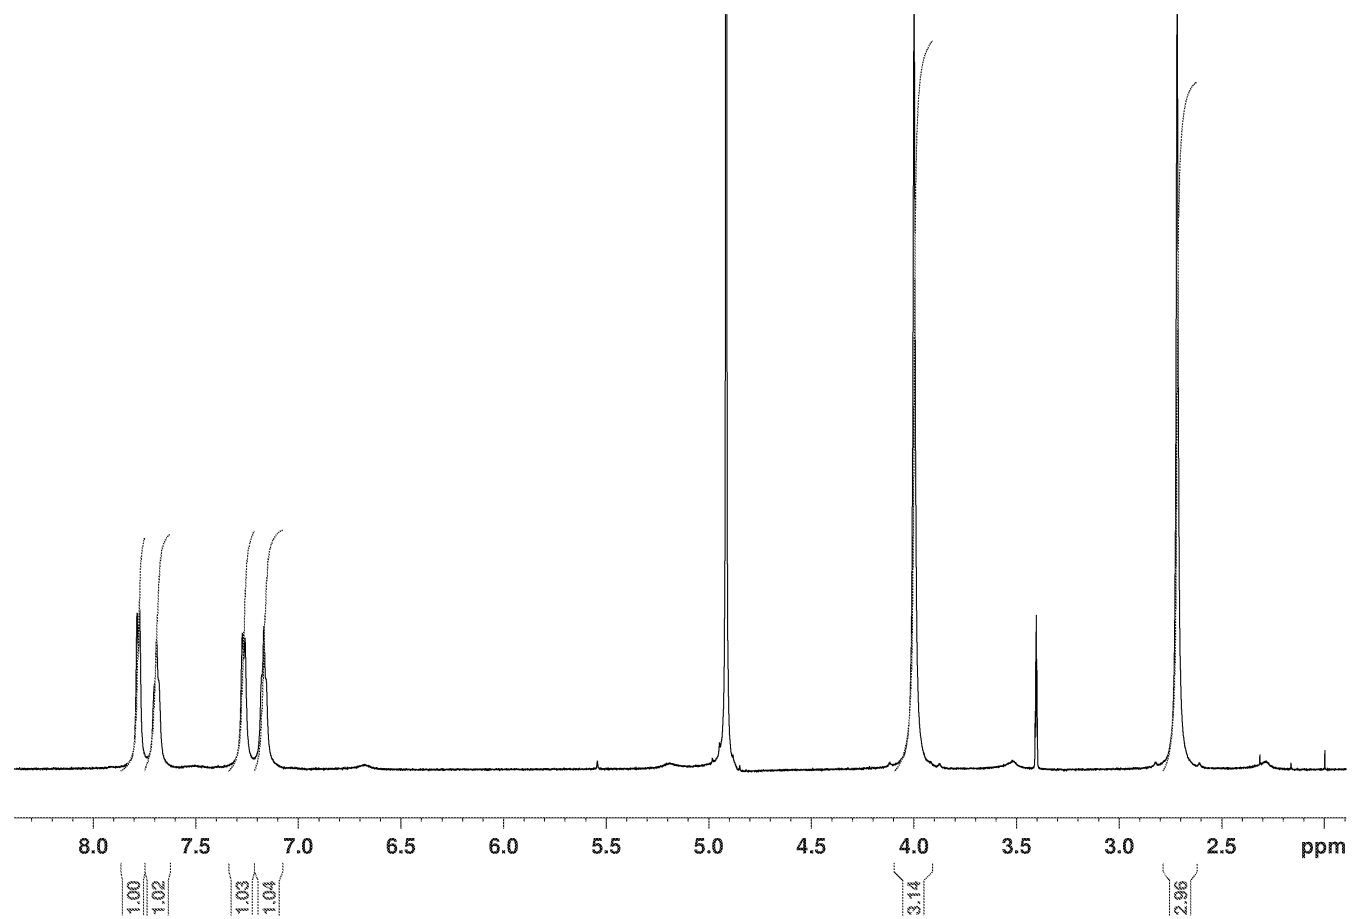

*para*-methoxy acetophenone [23]

$^1\text{H-NMR}$  ( $\text{D}_2\text{O}/\text{CD}_3\text{OD}$  9:1)

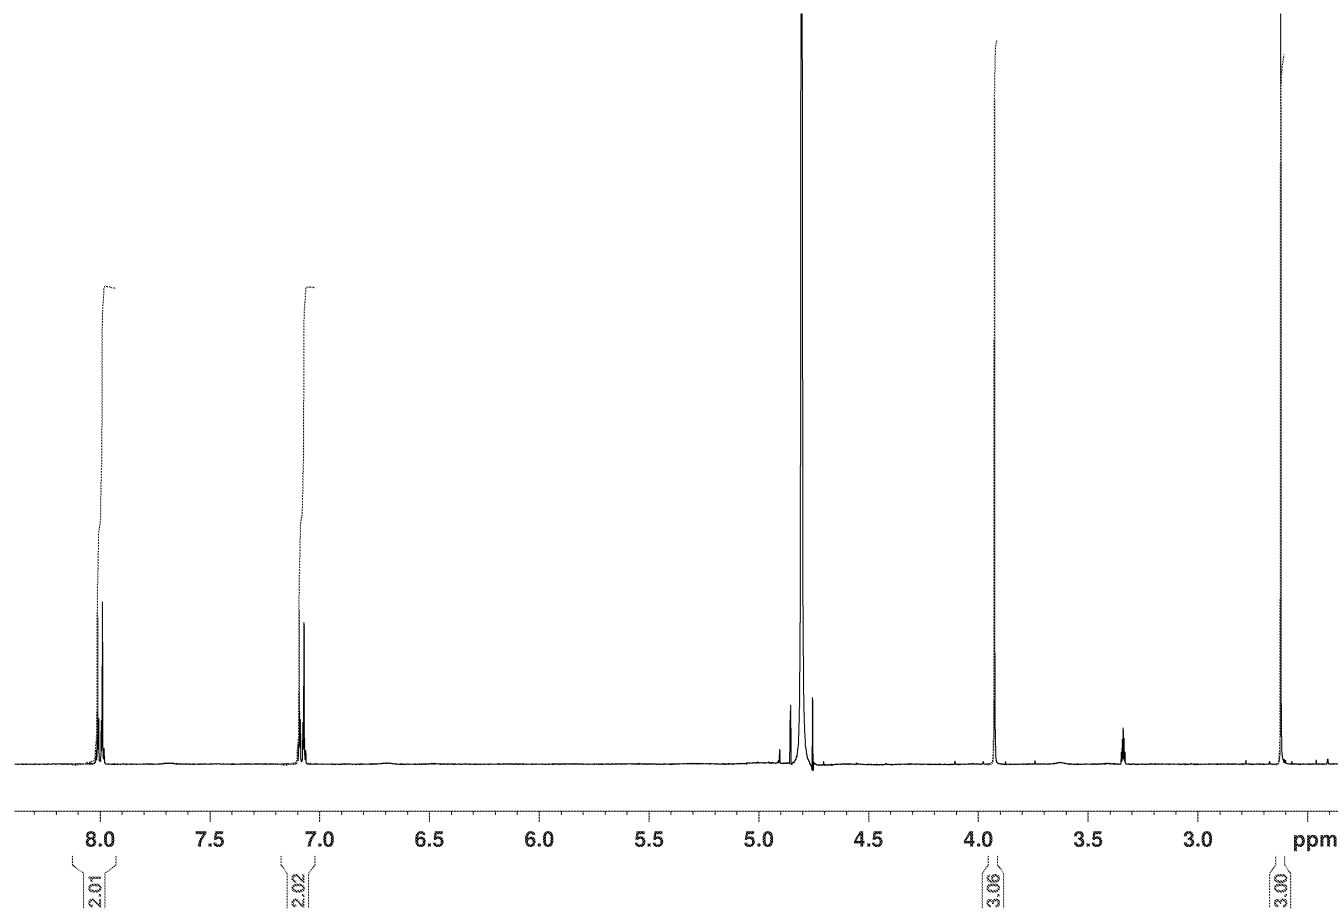

*ortho*-acetoxy acetophenone [24]

<sup>1</sup>H-NMR (D<sub>2</sub>O/CD<sub>3</sub>OD 9:1)

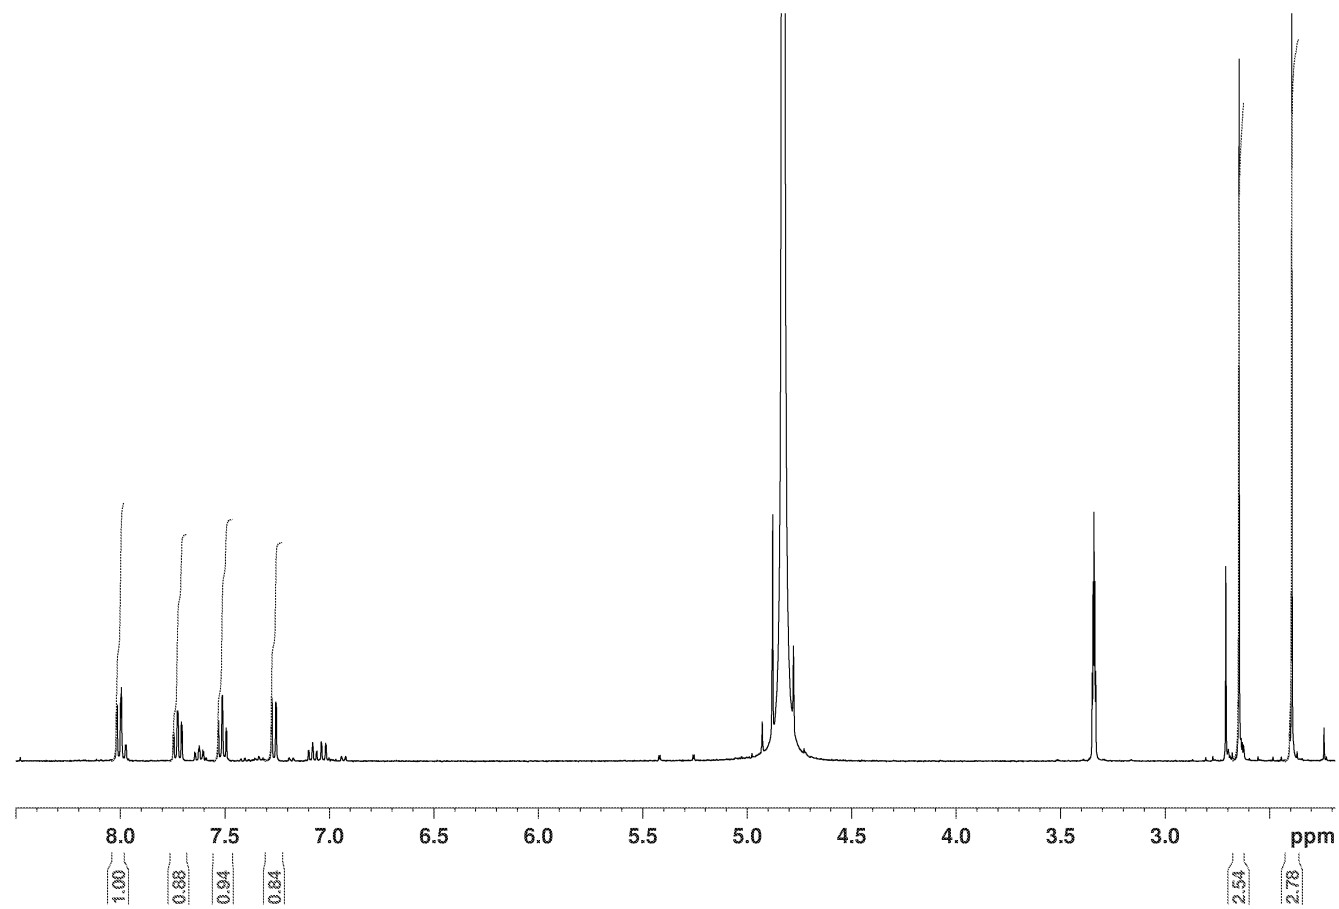



*para*-acetoxy acetophenone [25]

<sup>1</sup>H-NMR (D<sub>2</sub>O/CD<sub>3</sub>OD 9:1)

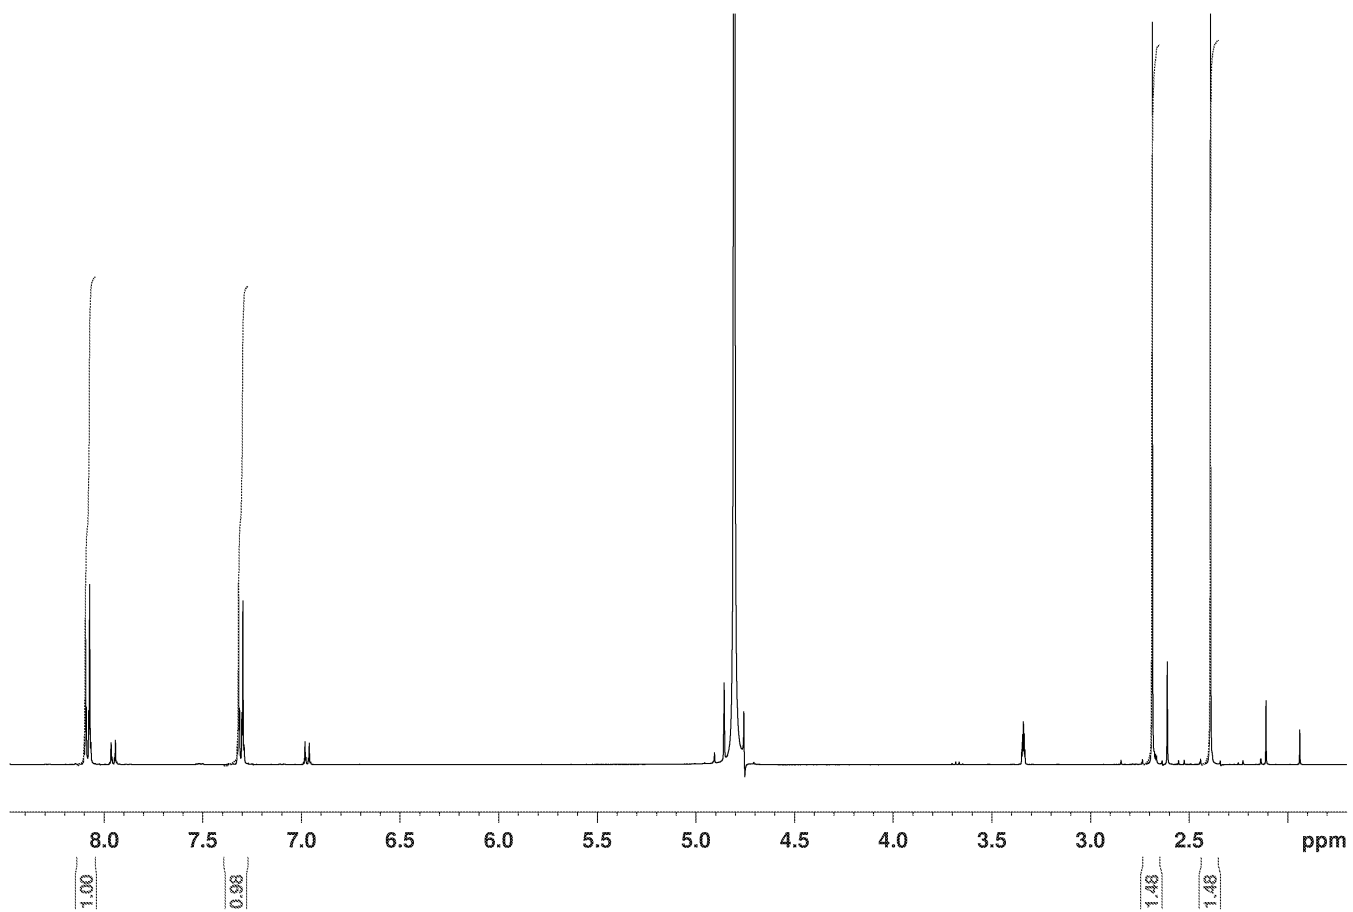

*meta*-acetamino acetophenone [26]

<sup>1</sup>H-NMR (D<sub>2</sub>O/CD<sub>3</sub>OD 9:1)

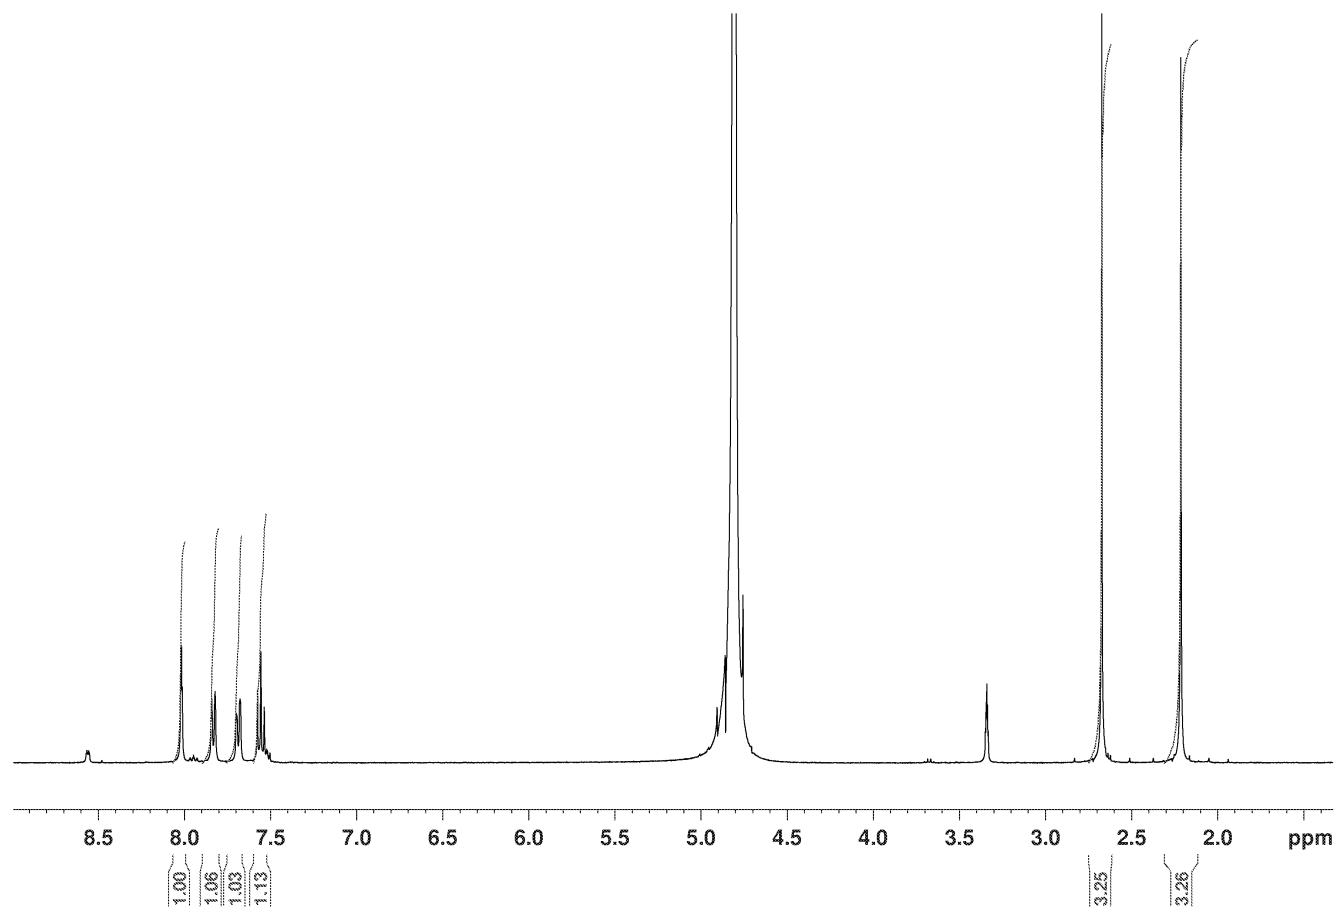

1-(*ortho*-chloro-phenyl) ethanol [28]

$^1\text{H-NMR}$  ( $\text{CDCl}_3$ )

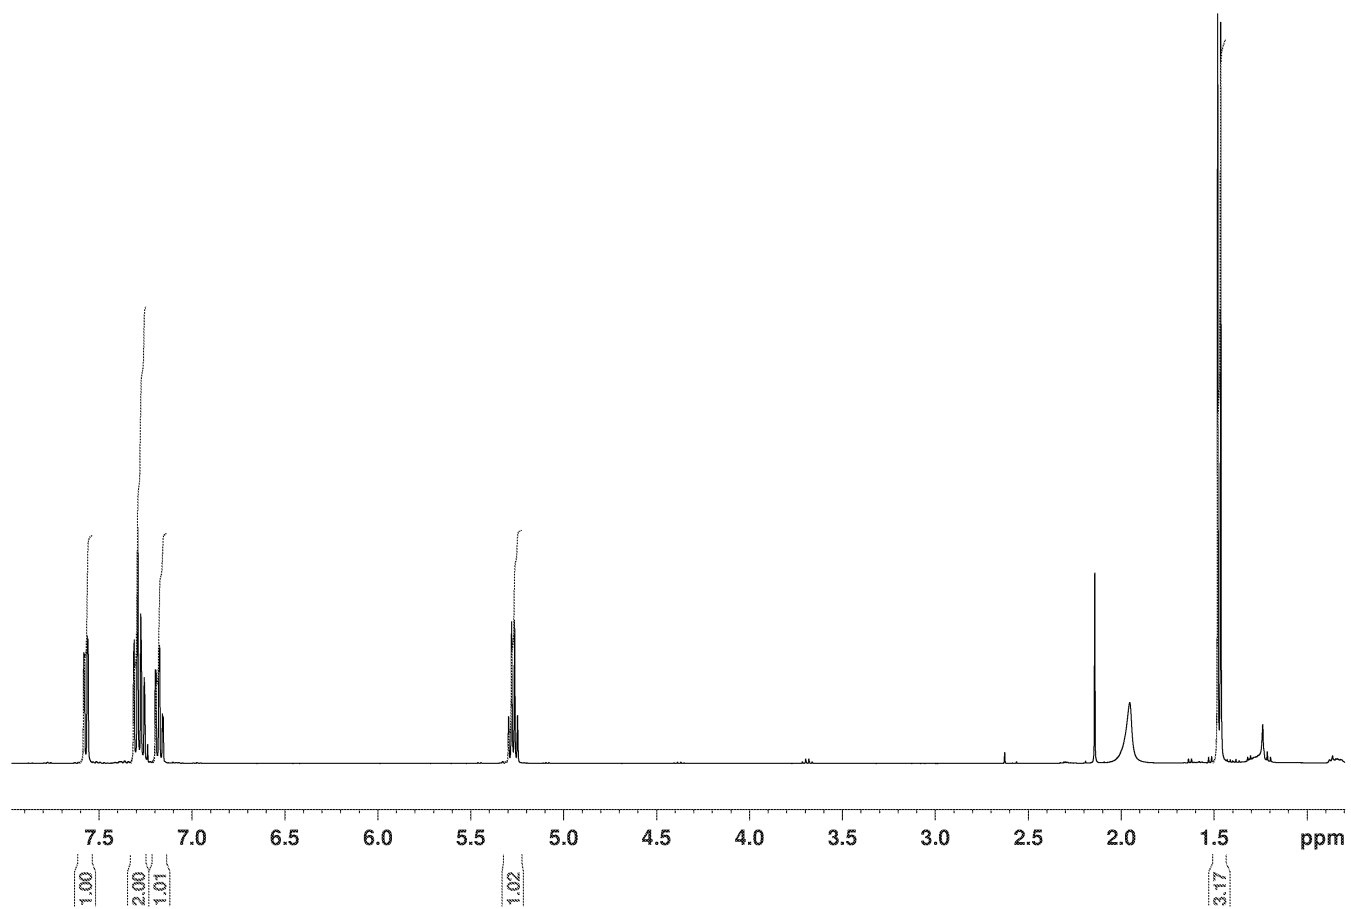

1-(*ortho*-bromo-phenyl) ethanol [29]

$^1\text{H-NMR}$  ( $\text{CDCl}_3$ )

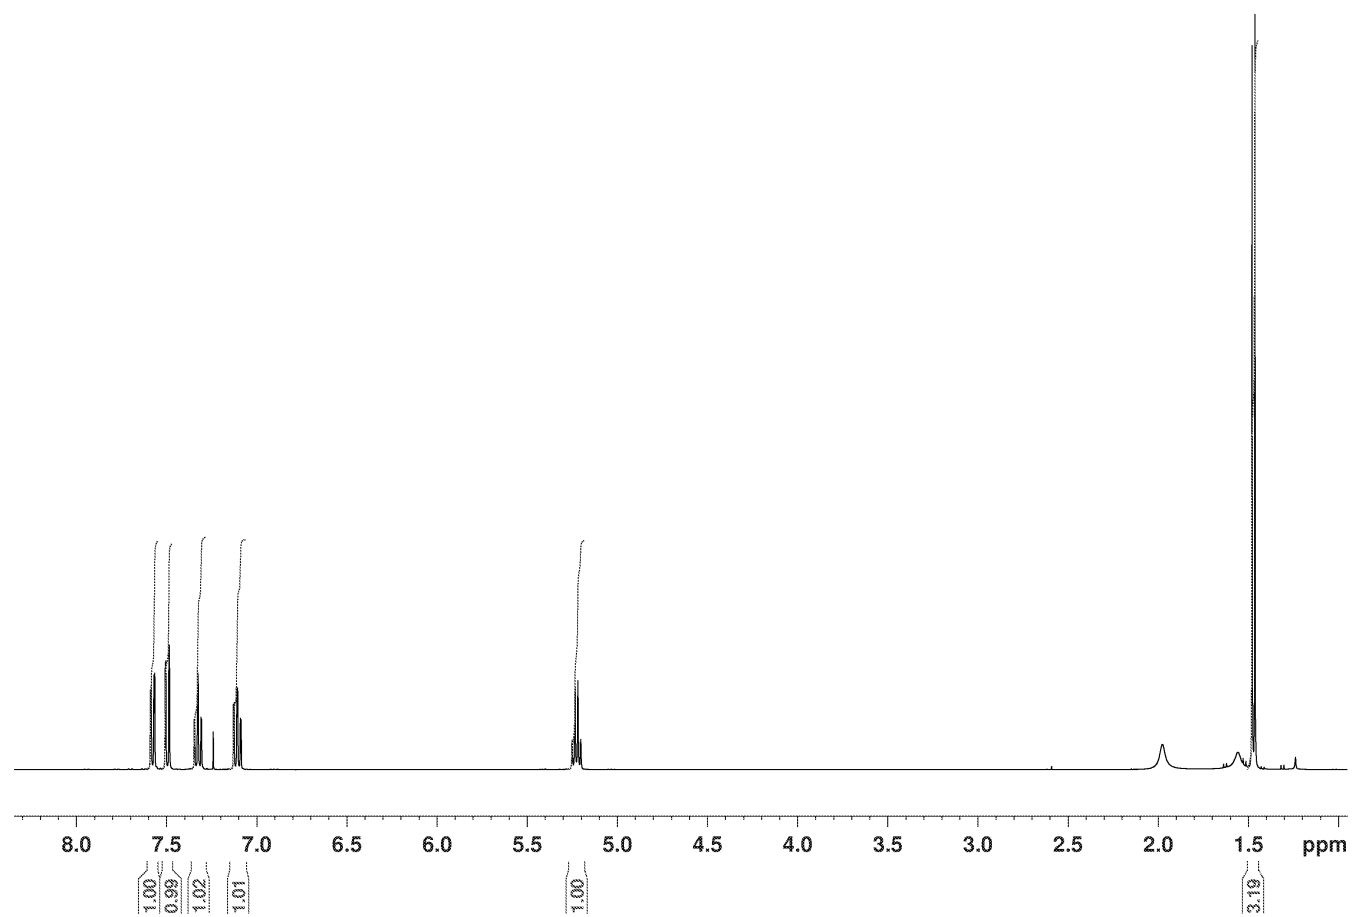

(*S*)-1-(*ortho*-Chlorophenyl) ethyl-(*S*)- $\alpha$ -methoxy- $\alpha$ -trifluoromethylphenylacetate [**30**] & 1-(*ortho*-chloro-phenyl) ethanol [**28**]

$^1\text{H-NMR}$  ( $\text{CDCl}_3$ )

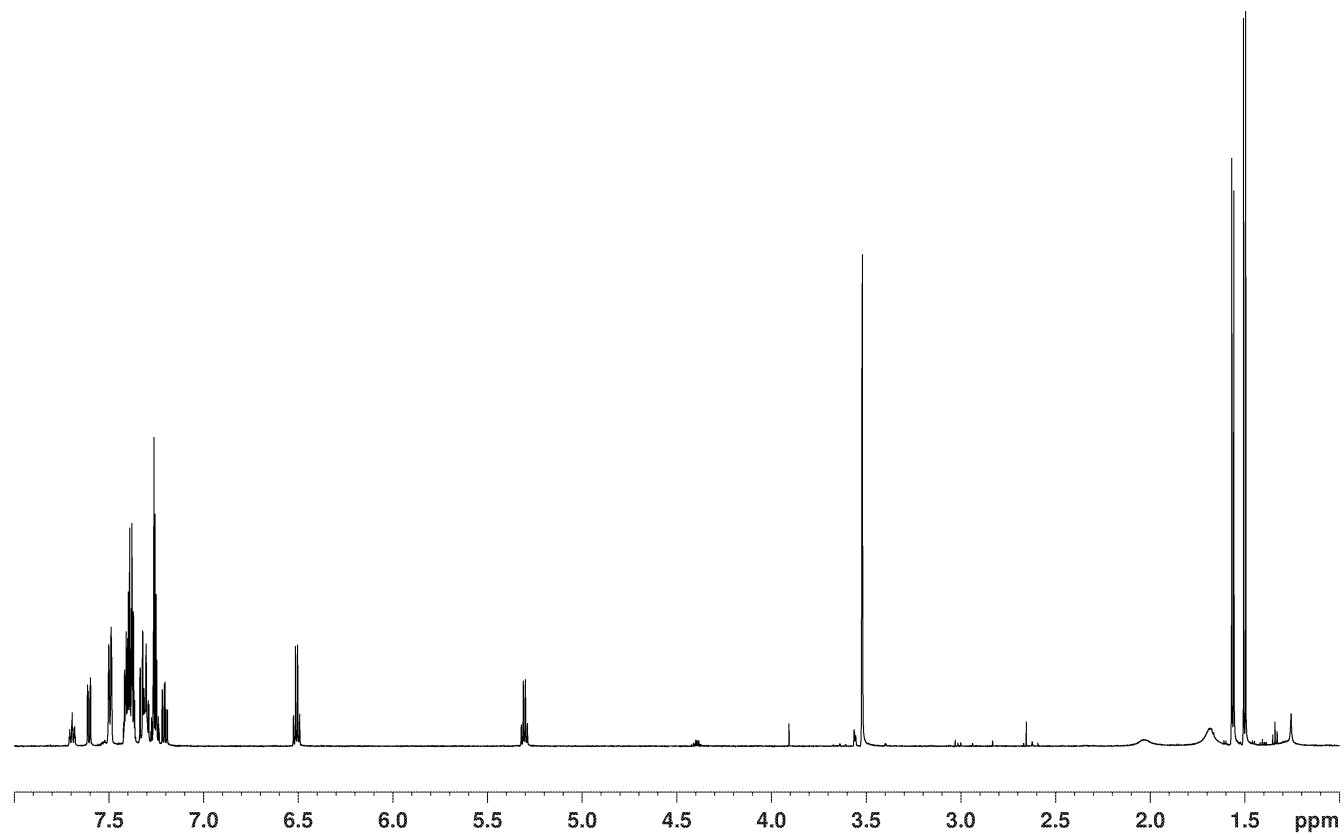

(*S*)-1-(*ortho*-Chlorophenyl) ethyl-(*R*)- $\alpha$ -methoxy- $\alpha$ -trifluoromethylphenylacetate [**31**]

$^1\text{H-NMR}$  ( $\text{CDCl}_3$ )

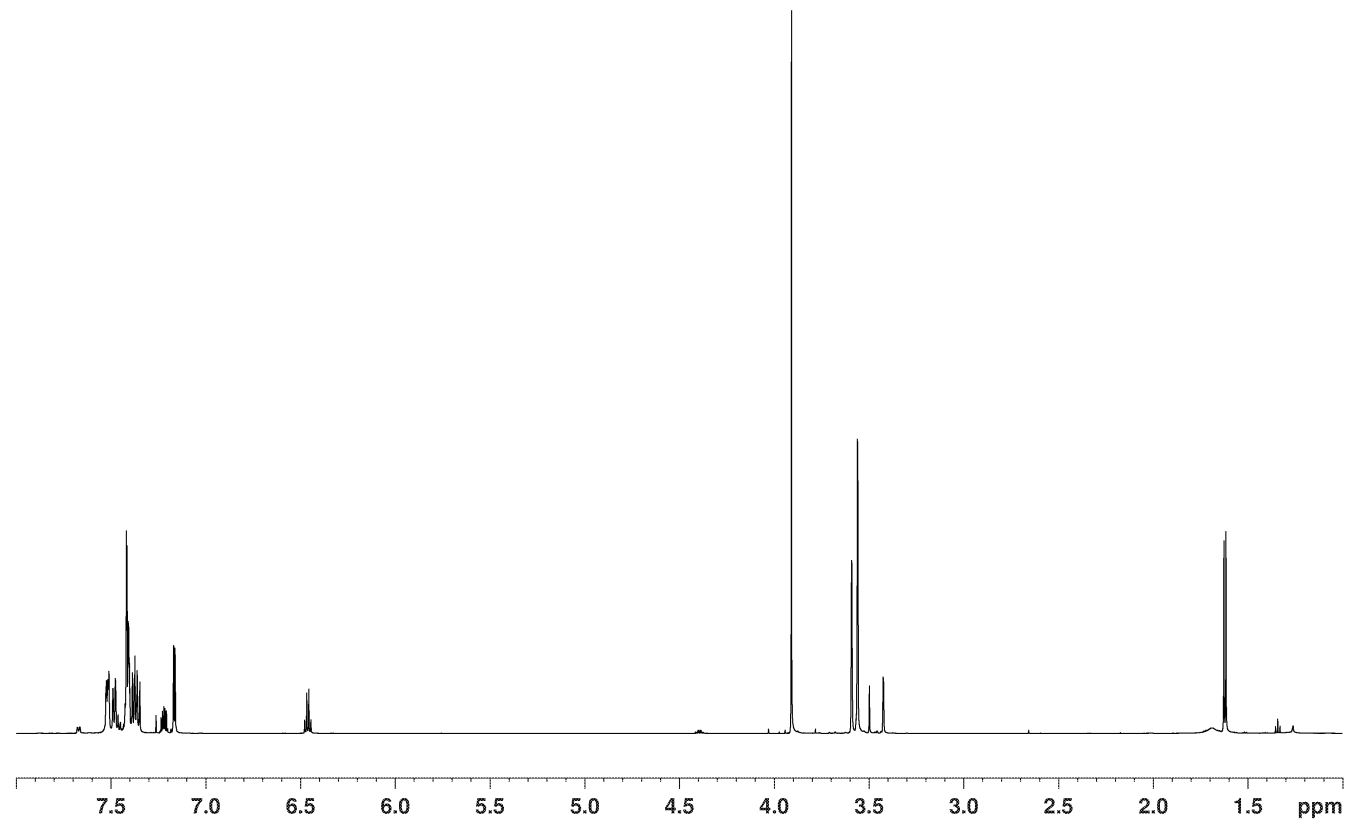

(*S*)-1-(*ortho*-bromophenyl) ethyl-(*S*)- $\alpha$ -methoxy- $\alpha$ -trifluoromethylphenylacetate [32]

$^1\text{H-NMR}$  ( $\text{CDCl}_3$ )

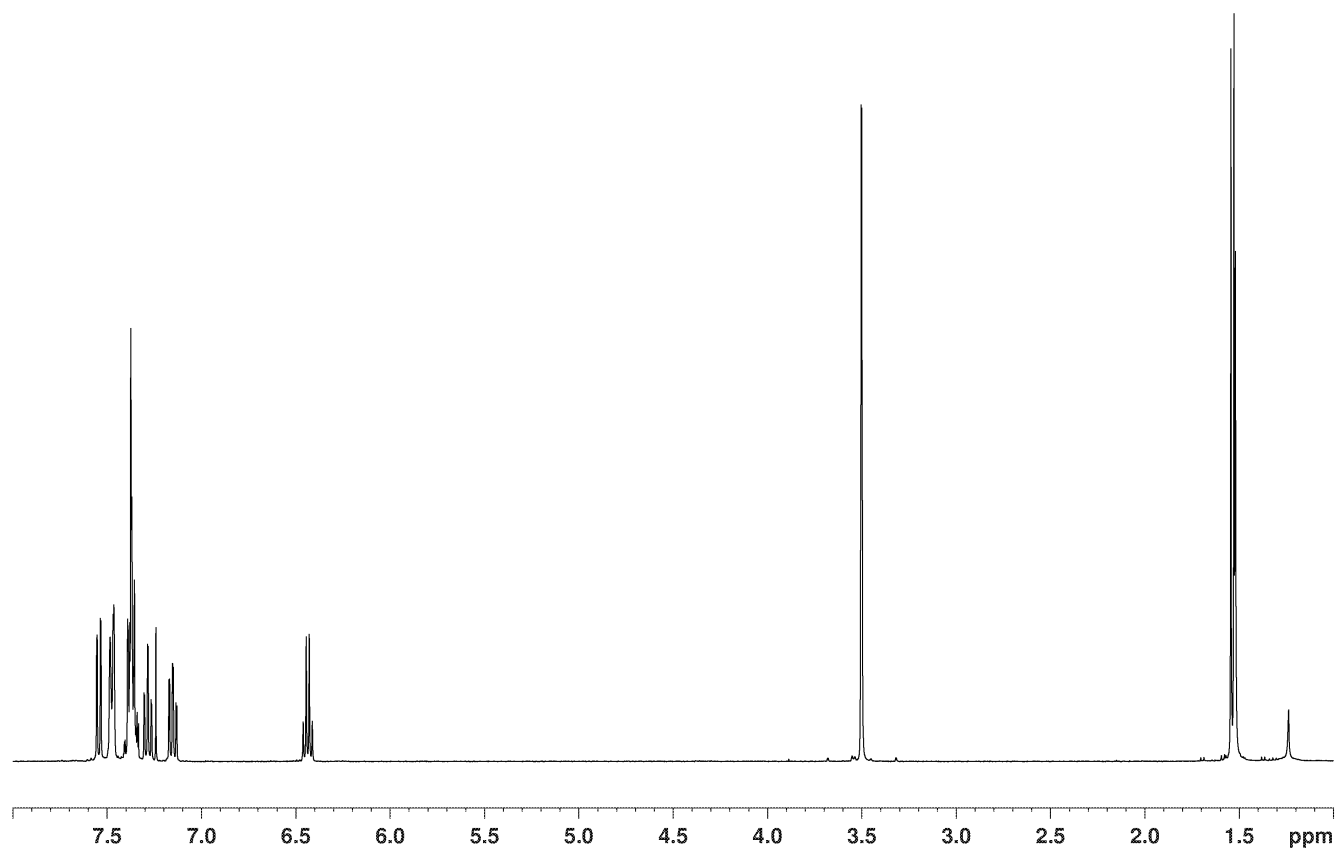

(*S*)-1-(*ortho*-bromophenyl) ethyl-(*R*)- $\alpha$ -methoxy- $\alpha$ -trifluoromethylphenylacetate [**33**]

$^1\text{H-NMR}$  ( $\text{CDCl}_3$ )

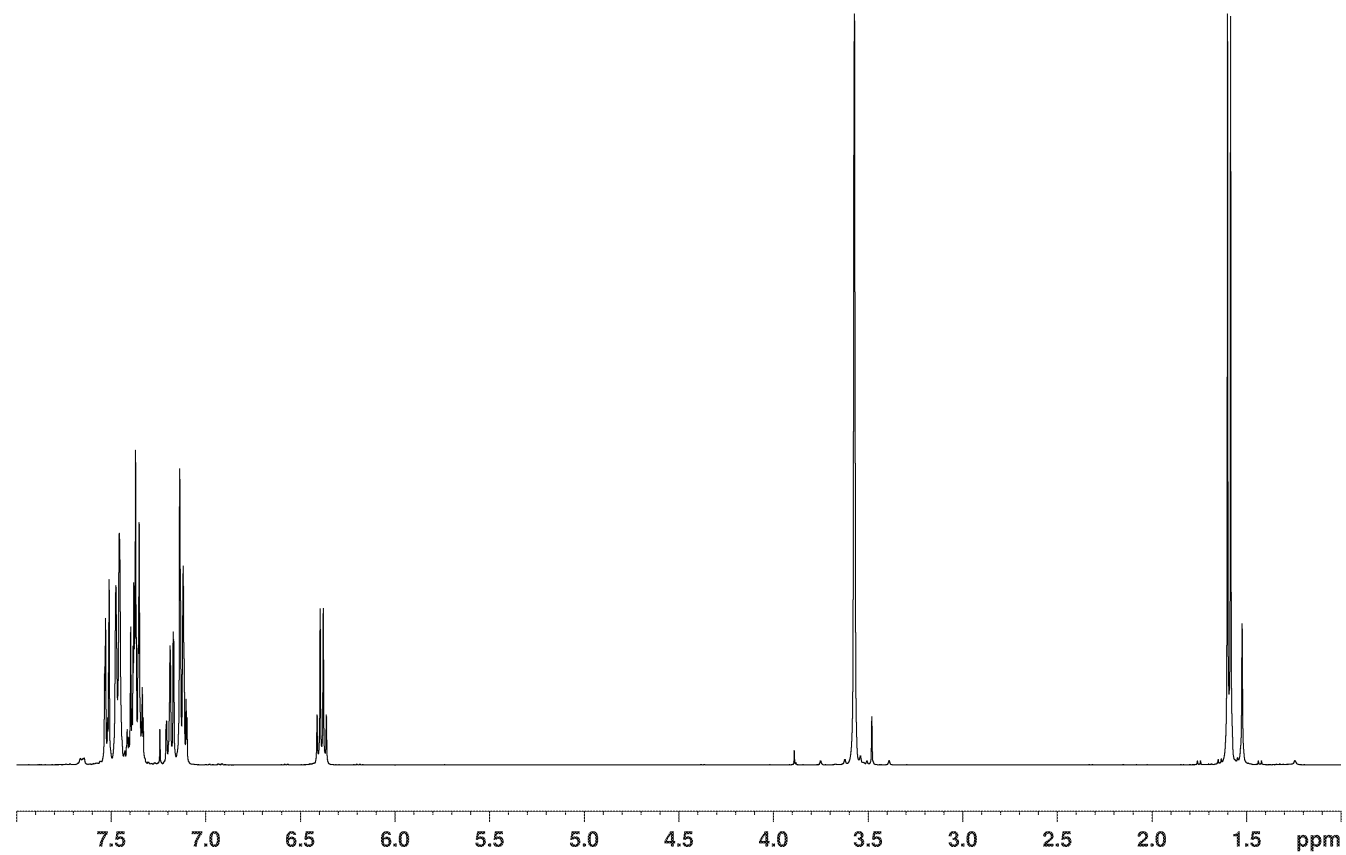

Supplement: c1ob05510k.pdf [file c1ob05510k.pdf]
